# Supplementary material
Source: HighWire-hosted journal article supplement (https://svn.smart01.highwire.org/content/svn-2024-003318)
Supplement: inline-supplementary-material-1 [file inline-supplementary-material-1.pdf]

**Table 1S. List of committees and coordinating centers in ANGEL-TNK**

| <b>Study Organization</b>               | <b>Member</b>       | <b>Department</b>                                  | <b>Hospital</b>                                                   |
|-----------------------------------------|---------------------|----------------------------------------------------|-------------------------------------------------------------------|
| <b>Steering Committee</b>               | Zhongrong Miao      | Department of Interventional Neuroradiology        | Beijing Tiantan Hospital, Capital Medical University              |
|                                         | Xiaochuan Huo       | Neurological Disease Center                        | Beijing Anzhen Hospital, Capital Medical University               |
|                                         | Bernard Yan         | Melbourne Brain Center                             | Royal Melbourne Hospital                                          |
|                                         | Yongjun Wang        | Department of Neurology                            | Beijing Tiantan Hospital, Capital Medical University              |
|                                         | Thanh N. Nguyen     | Department of Neurology and Radiology              | Boston Medical Center, Boston University School of Medicine       |
|                                         | Yilong Wang         | Department of Neurology                            | Beijing Tiantan Hospital, Capital Medical University              |
|                                         | Tudor G. Jovin      | Department of Neurology                            | Cooper University Hospital                                        |
|                                         | David S. Liebeskind | Department of Neurology                            | University of California at Los Angeles                           |
|                                         | Liping Liu          | Department of Neurology                            | Beijing Tiantan Hospital, Capital Medical University              |
|                                         | Xingquan Zhao       | Department of Neurology                            | Beijing Tiantan Hospital, Capital Medical University              |
|                                         | Zeguang Ren         | Department of Neurosurgery                         | The Affiliated Hospital of Guizhou Medical University             |
| <b>Independent imaging Core Lab</b>     | Jing Jing           | Tiantan Neuroimaging Center of Excellence (T-NICE) | China National Clinical Research Center for Neurological Diseases |
|                                         | Zhe Zhang           | Tiantan Neuroimaging Center of Excellence (T-NICE) | China National Clinical Research Center for Neurological Diseases |
|                                         | Xuewei Xie          | Tiantan Neuroimaging Center of Excellence (T-NICE) | China National Clinical Research Center for Neurological Diseases |
| <b>Data safety and monitoring board</b> | Kangning Chen       | Department of Neurology                            | The Southwest Hospital of Army Medical University                 |
|                                         | Chen Yao            | Department of Medical Statistics                   | Peking University First Hospital                                  |
|                                         | Wei Wu              | Department of Neurology                            | Qilu Hospital of Shandong University                              |
| <b>Clinical event committee</b>         | Zixiao Li           | Department of Neurology                            | Beijing Tiantan Hospital, Capital Medical University              |

|                            |                         |                                                                    |                                                            |
|----------------------------|-------------------------|--------------------------------------------------------------------|------------------------------------------------------------|
| <b>Executive committee</b> | Xiaoling Liao           | Department of Neurology                                            | Beijing Tiantan Hospital, Capital Medical University       |
|                            | Gaoting Ma              | Department of Neurology                                            | Xuanwu Hospital, Capital Medical University                |
|                            | Zhongrong Miao          | Department of Interventional Neuroradiology                        | Beijing Tiantan Hospital, Capital Medical University       |
|                            | Xiaochuan Huo           | Neurological Disease Center                                        | Beijing Anzhen Hospital, Capital Medical University        |
|                            | Gang Luo                | Department of Interventional Neuroradiology                        | Beijing Tiantan Hospital, Capital Medical University       |
|                            | Dapeng Sun              | Department of Interventional Neuroradiology                        | Beijing Tiantan Hospital, Capital Medical University       |
|                            | Xuelel Zhang            | Neurological Disease Center                                        | Beijing Anzhen Hospital, Capital Medical University        |
|                            | Wenhua Chen             | Department of Neurology                                            | Fujian Medical University Union Hospital                   |
|                            | Hongxing Han            | Department of Neurology                                            | Linyi People's Hospital                                    |
|                            | Tingyu Yi               | Department of Neurology                                            | Zhangzhou Affiliated Hospital of Fujian Medical University |
|                            | Xiaoxi Yao              | Department of Neurology                                            | The first people's hospital of Chenzhou                    |
|                            | Guangxiong Yuan         | Department of Emergency                                            | Xiangtan Central Hospital                                  |
|                            | Xueli Cai               | Department of Neurology                                            | The Municipal Central Hospital of Lishui                   |
|                            | Changming Wen           | Department of Neurology                                            | Nanyang Central Hospital                                   |
|                            | Ming Wei                | Department of Neurosurgery                                         | Tianjin huanhu hospital                                    |
|                            | Qingcheng Yang          | Department of Neurology                                            | Anyang People's Hospital                                   |
|                            | Zhiming Zhou            | Department of Neurology                                            | Yijishan Hospital of Wannan Medical College                |
|                            | Mingze Chang            | Department of Neurology                                            | Xi'an No.3 Hospital                                        |
|                            | Guangxian Nan           | Department of Neurology                                            | China-Japan Union Hospital of Jilin University             |
|                            | Jing Wang               | Department of Neurointerventional Radiology                        | Beijing Fengtai You'anmen Hospital                         |
| Guangyu Xiang              | Department of Neurology | Xuchang Central Hospital                                           |                                                            |
| Wen Gao                    | Department of Neurology | Liuzhou People's Hospital Affiliated to Guangxi Medical University |                                                            |

|                                               |               |                                                                   |                                                                            |
|-----------------------------------------------|---------------|-------------------------------------------------------------------|----------------------------------------------------------------------------|
|                                               | Li Zhou       | Department of Neurology                                           | Weifang peoples' Hospital                                                  |
|                                               | Hong Zhang    | Department of Neurology                                           | General Hospital of Fushun Mining Bureau of Liaoning Health Industry Group |
|                                               | Chenghua Xu   | Department of Neurology                                           | Huangyan Hospital of Wenzhou Medical University                            |
|                                               | Yaxuan Sun    | Department of Neurology                                           | Shanxi Provincial People's Hospital                                        |
|                                               | Chenghua Xu   | Department of Neurology                                           | Taizhou First People's Hospital                                            |
|                                               | Liyong Zhang  | Department of Neurosurgery                                        | Liaocheng People's Hospital                                                |
|                                               | Jianfeng Han  | Department of Neurology                                           | The First Affiliated Hospital of Xi'an Jiaotong University                 |
| <b>Trial manager</b>                          | Xiaochuan Huo | Department of Interventional Neuroradiology                       | Beijing Tiantan Hospital, Capital Medical University                       |
|                                               | Gang Luo      | Department of Interventional Neuroradiology                       | Beijing Tiantan Hospital, Capital Medical University                       |
| <b>Statistical and Data Management Center</b> | Jingjun Zhao  | Quality Assurance                                                 | Ericure Medical Technology. Co., Ltd.                                      |
|                                               | Qi Zhou       | China National Clinical Research Center for Neurological Diseases | Beijing Tiantan Hospital, Capital Medical University                       |
|                                               | Hongyi Yan    | China National Clinical Research Center for Neurological Diseases | Beijing Tiantan Hospital, Capital Medical University                       |
| <b>Contract Research Organization</b>         | Fengjie Jie   | Project Operation                                                 | Wisemed Medical Technology. Co., Ltd.                                      |
|                                               | Dan Long      | Project Operation                                                 | Wisemed Medical Technology. Co., Ltd.                                      |
|                                               | Han Zhao      | Project Operation                                                 | Wisemed Medical Technology. Co., Ltd.                                      |
|                                               | Yuhuan Chen   | Project Operation                                                 | Wisemed Medical Technology. Co., Ltd.                                      |
|                                               | Jian Yan      | Project Operation                                                 | Wisemed Medical Technology. Co., Ltd.                                      |
|                                               | Xinghua Lu    | Data Management                                                   | Wisemed Medical Technology. Co., Ltd.                                      |
|                                               | Bo Liu        | Data Management                                                   | Wisemed Medical Technology. Co., Ltd.                                      |
|                                               | Hang Yu       | Medical Sciences                                                  | Wisemed Medical Technology. Co., Ltd.                                      |
|                                               | Wanru Wang    | Medical Sciences                                                  | Wisemed Medical Technology. Co., Ltd.                                      |

---

|             |                  |                                          |
|-------------|------------------|------------------------------------------|
| Juan Wang   | Medical Sciences | Wisemed Medical Technology.<br>Co., Ltd. |
| Yayun Sheng | IT Support       | Wisemed Medical Technology.<br>Co., Ltd. |
| Zhou Zhou   | IT Support       | Wisemed Medical Technology.<br>Co., Ltd. |

---
